# Supplementary material
Source: ML conference proceedings conference paper supplement (https://openaccess.thecvf.com/content/ICCV2023/html/Wu_HSR-Diff_Hyperspectral_Image_ICCV_2023_paper.html)
Supplement: Supplementary file 1 [file Wu_HSR-Diff_Hyperspectral_Image_ICCV_2023_supplemental.pdf]

# HSR-Diff: Hyperspectral Image Super-Resolution via Conditional Diffusion Models

## Supplementary Material

Chanyue Wu<sup>1\*</sup>, Dong Wang<sup>1\*</sup>, Yunpeng Bai<sup>2\*</sup>, Hanyu Mao<sup>1</sup>, Ying Li<sup>1†</sup>, Qiang Shen<sup>2</sup>

<sup>1</sup>National Engineering Laboratory for Integrated Aero-Space-Ground-Ocean Big Data Application Technology, Shaanxi Provincial Key Laboratory of Speech & Image Information Processing, School of Computer Science, Northwestern Polytechnical University, China

<sup>2</sup>Department of Computer Science, Faculty of Business and Physical Sciences, Aberystwyth University, U.K.

{chanyuewu, dongwang, maomhy}@mail.nwpu.edu.cn lybyp@nwpu.edu.cn {yub3, qqs}@aber.ac.uk

### 1. Results of $\times 8$ and $\times 16$ Experiments

| Methods       | PSNR $\uparrow$ | SSIM $\uparrow$ | SAM $\downarrow$ | ERGAS $\downarrow$ |
|---------------|-----------------|-----------------|------------------|--------------------|
| UTV-TD [5]    | 47.43           | 0.9986          | 1.47             | 1.081              |
| UAL [6]       | 49.71           | 0.9995          | 0.95             | 0.546              |
| BRResNet [2]  | 52.70           | 0.9996          | 1.10             | 0.441              |
| CMHF-Net [4]  | 49.73           | 0.9996          | 0.99             | 0.406              |
| Fusformer [1] | 50.99           | 0.9995          | 0.97             | 0.374              |
| UAL-DMI [3]   | 53.10           | 0.9997          | 0.67             | 0.346              |
| HSR-Diff      | <b>54.22</b>    | <b>0.9998</b>   | <b>0.57</b>      | <b>0.286</b>       |

Table 1: Averaged PSNR, SSIM, SAM, and ERGAS of compared methods on Chikusei (the upscaling factor is 8). The  $\uparrow$  or  $\downarrow$  indicates higher or lower values corresponding to better results.

| Methods       | PSNR $\uparrow$ | SSIM $\uparrow$ | SAM $\downarrow$ | ERGAS $\downarrow$ |
|---------------|-----------------|-----------------|------------------|--------------------|
| UTV-TD [5]    | 46.38           | 0.9963          | 1.68             | 0.854              |
| UAL [6]       | 49.52           | 0.9995          | 0.96             | 0.318              |
| BRResNet [2]  | 51.69           | 0.9996          | 1.11             | 0.221              |
| CMHF-Net [4]  | 48.33           | 0.9995          | 1.13             | 0.282              |
| Fusformer [1] | 50.55           | 0.9994          | 1.05             | 0.223              |
| UAL-DMI [3]   | 52.37           | 0.9996          | 0.72             | 0.235              |
| HSR-Diff      | <b>53.71</b>    | <b>0.9998</b>   | <b>0.63</b>      | <b>0.193</b>       |

Table 2: Averaged PSNR, SSIM, SAM, and ERGAS of compared methods on Chikusei (the upscaling factor is 16). The  $\uparrow$  or  $\downarrow$  indicates higher or lower values corresponding to better results.

\*Equal contribution

†Corresponding author.

### 2. Visual Quality Comparison

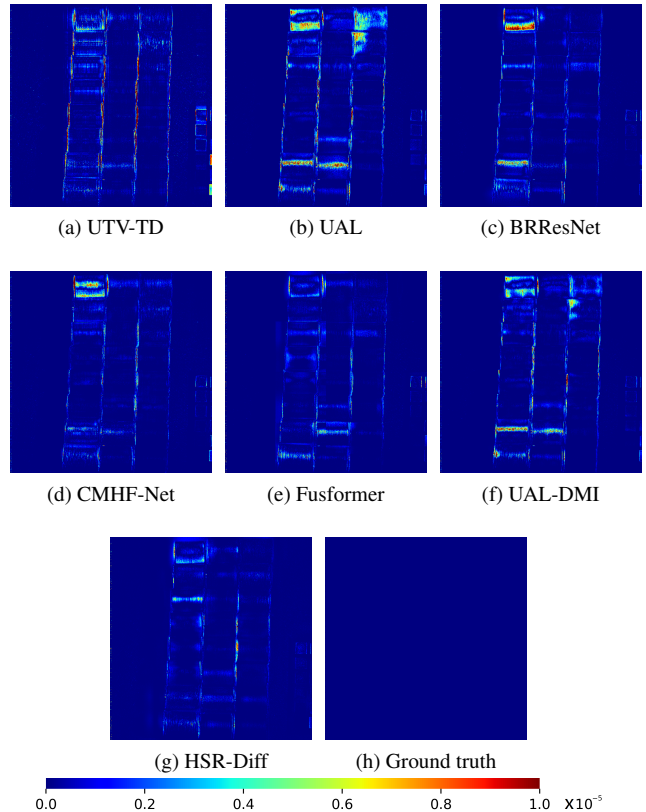

Figure 1: Visual quality comparison (residual heatmaps) for fused HSIs of all competing methods on the *thread\_spools* image of CAVE.

## References

- [1] Jin-Fan Hu, Ting-Zhu Huang, Liang-Jian Deng, Hong-Xia Dou, Danfeng Hong, and Gemine Vivone. Fusformer: A transformer-based fusion network for hyperspectral image super-resolution. *IEEE Geoscience and Remote Sensing Letters*, 19:1–5, 2022. [1](#)
- [2] Zi-Rong Jin, Liang-Jian Deng, Tian-Jing Zhang, and Xiao-Xu Jin. Bam: Bilateral activation mechanism for image fusion. In *Proceedings of the 29th ACM International Conference on Multimedia*, pages 4315–4323, 2021. [1](#)
- [3] Xiuheng Wang, Jie Chen, and Cédric Richard. Hyperspectral image super-resolution with deep priors and degradation model inversion. In *ICASSP 2022-2022 IEEE International Conference on Acoustics, Speech and Signal Processing (ICASSP)*, pages 2814–2818. IEEE, 2022. [1](#)
- [4] Qi Xie, Minghao Zhou, Qian Zhao, Zongben Xu, and Deyu Meng. Mhf-net: An interpretable deep network for multi-spectral and hyperspectral image fusion. *IEEE Transactions on Pattern Analysis and Machine Intelligence*, 2022. [1](#)
- [5] Ting Xu, Ting-Zhu Huang, Liang-Jian Deng, Xi-Le Zhao, and Jie Huang. Hyperspectral image superresolution using unidirectional total variation with tucker decomposition. *IEEE Journal of Selected Topics in Applied Earth Observations and Remote Sensing*, 13:4381–4398, 2020. [1](#)
- [6] Lei Zhang, Jiangtao Nie, Wei Wei, Yanning Zhang, Shengcai Liao, and Ling Shao. Unsupervised adaptation learning for hyperspectral imagery super-resolution. In *Proceedings of the IEEE/CVF Conference on Computer Vision and Pattern Recognition*, pages 3073–3082, 2020. [1](#)
